# Supplementary material
Source: publisher figshare collection journal article supplement (https://karger.figshare.com/articles/dataset/_/7291115)
Supplement: Supplementary file 1 [file 1]

Archive with 3 entries (3 files):
- 490000_sm2.PDF
- 490000_sm3.PDF
- 490000_sm1.PDF
