# Supplementary material
Source: publisher figshare collection journal article supplement (https://karger.figshare.com/articles/dataset/_/7291115)
Supplement: Supplementary file 1 [file 1 › 490000_sm2.PDF]

**Online supplemental Table 1.** Socio-demographic and clinical variables of the sample

---

|                                         |               |
|-----------------------------------------|---------------|
| <i>Age</i>                              | 56.13 ±12     |
| <i>Education</i> (in years)             | 11.5±4.52     |
| <i>Sex</i>                              |               |
| Males                                   | 90 (67.2%)    |
| Females                                 | 44 (32.8%)    |
| <i>Marital Status</i>                   |               |
| Single                                  | 29 (22%)      |
| Married                                 | 89 (88.7%)    |
| Divorced                                | 10 (7.5%)     |
| Widowed                                 | 6 (4.4%)      |
| <i>Living situation</i>                 | 93 (69.9)     |
| Family                                  | 22 (16.5%)    |
| Parents                                 | 11 (8.3%)     |
| Alone                                   | 6 (4.4%)      |
| Other                                   |               |
| <i>Occupation</i>                       | 42 (31.34%)   |
| Employed                                | 9 (7%)        |
| Unemployed                              | 57 (44.2%)    |
| Retired                                 | 3 (2.3%)      |
| Housewives                              | 13 (9.4%)     |
| Other                                   |               |
| <i>Previous psychological disorders</i> |               |
| Yes                                     | 41 (30.6%)    |
| No                                      | 93 (69.4%)    |
| <i>Blood test values</i>                |               |
| Hemoglobin                              | 12.4 ±1.53    |
| Calcemia                                | 2.57 ± 1.2    |
| Phosphohremia                           | 3.27 ±0.65    |
| Total Protein                           | 6.6 ± 0.71    |
| GFR-MDRD                                | 53.2 ± 17.5   |
| Albumin                                 | 58.1 ± 4.97   |
| Parathormone                            | 84.45 ± 51.14 |
| BMI                                     | 24.5 ± 3.5    |
| Systolic blood pressure                 | 130.45 ± 13.9 |
| Diastolic blood pressure                | 78.25 ± 7.93  |

---
