# Supplementary material
Source: publisher figshare collection journal article supplement (https://karger.figshare.com/articles/dataset/_/7291115)
Supplement: Supplementary file 1 [file 1 › 490000_sm3.PDF]

**Online supplemental Table 2.** Ranking order of DCPR and ICD-0 diagnoses (%)

---

**Rank DCPR (multiple diagnoses)**

No DCPR diagnosis = 49 (36.7%)

DCPR diagnosis n=85 (63.4%)

- 1 diagnosis= 43 (32%)

- Multiple diagnoses  $\geq 2$  = 42 (31.3%)

|                    |           |
|--------------------|-----------|
| <i>Cluster AIB</i> | 42 (31.3) |
| Health anxiety     | 19 (14.2) |
| Illness denial     | 18 (13.4) |
| Disease phobia     | 4 (3)     |
| Thanatophobia      | 1 (0.7)   |

|                             |           |
|-----------------------------|-----------|
| <i>Cluster Irritability</i> | 42 (31.3) |
| Irritable mood              | 29 (21.6) |
| Type A behavior             | 13 (9.7)  |

|                             |           |
|-----------------------------|-----------|
| <i>Cluster Somatization</i> | 26 (19.3) |
| Persistent somatization     | 17 (12.7) |
| Functional somatic symptoms | 7 (5.2)   |
| Conversion symptoms         | 1 (0.7)   |
| Anniversary reaction        | 1 (0.7)   |

|                         |           |
|-------------------------|-----------|
| <i>Other Constructs</i> | 54 (40.3) |
| Demoralization          | 23 (17.2) |
| Alexithymia             | 31 (23.1) |

**Rank ICD diagnosis**

|                                                              |            |
|--------------------------------------------------------------|------------|
| No ICD diagnosis                                             | 88 (65.7)  |
| ICD-10 diagnosis                                             | 46 (34.3%) |
| - F43 Reaction to severe stress.<br>and adjustment disorders | 21 (15.7)  |
| - F40-41 Anxiety disorders                                   | 14 (10.4)  |
| - F32-34;38-39<br>Mood [affective] disorders                 | 11 (8.2)   |

---
